# Supplementary material
Source: Springer Nature journal article supplement (https://www.springermedizin.de/resource/supplementary/13069_2013_130_MOESM3_ESM.pdf/9659844)

## IL-17A

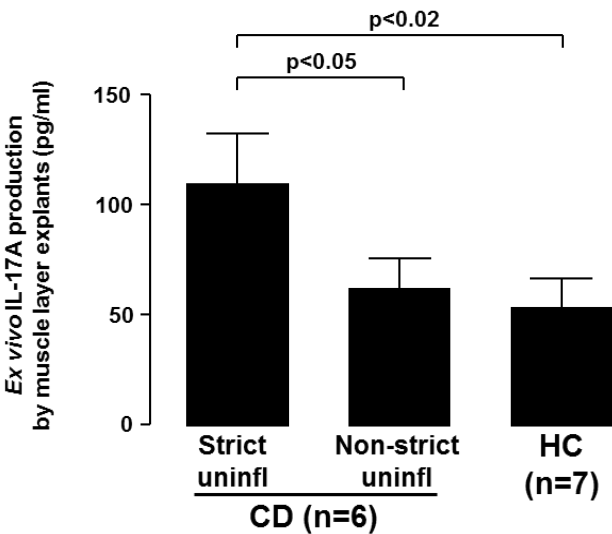

## IL-17E

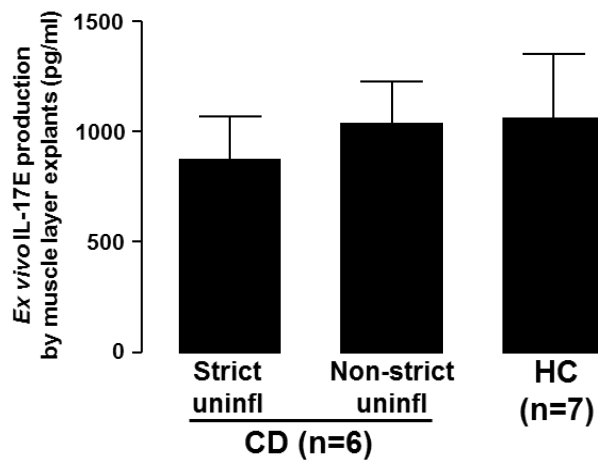

## IL-6

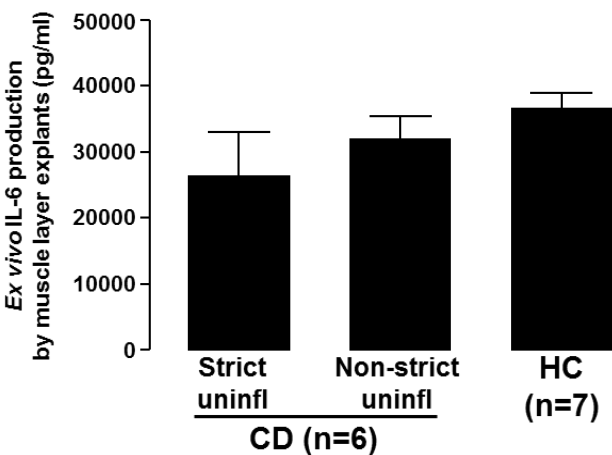

## TNF- $\alpha$

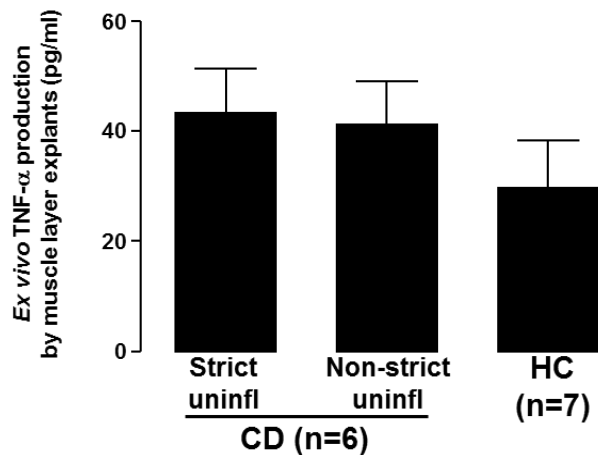

## Collagen

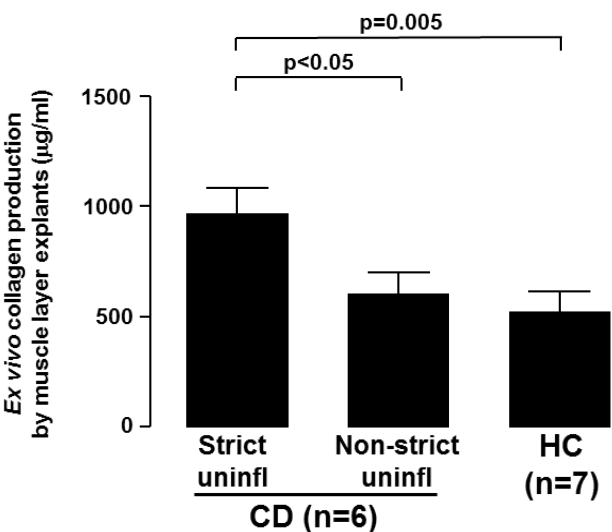

## TGF- $\beta$ 1

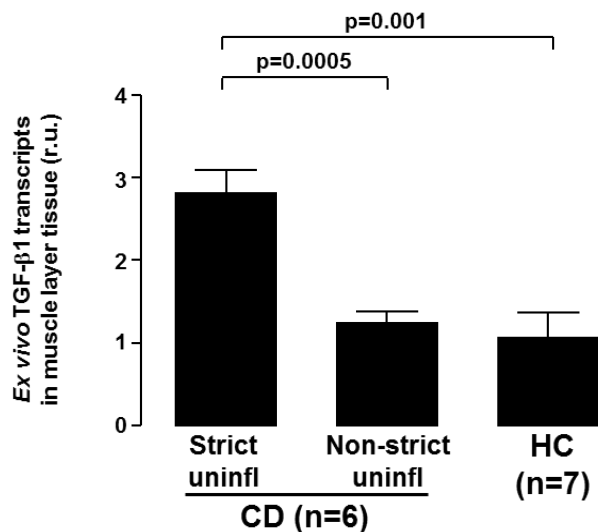

Supplement: MOESM3 [file 9659844]
